# Supplementary material for: Preparation and characterisation of an57Fe enriched haemoglobin spike material for species-specific isotope dilution mass spectrometry
Source: Royal Society of Chemistry journal article supplement (doi:10.1039/c6ja00028b), 2016-01-01
Supplement: c6ja00028b1.pdf [file c6ja00028b1.pdf]

## Electronic Supplementary Information (ESI)

### Preparation and characterisation of $^{57}\text{Fe}$ enriched haemoglobin spike material for species-specific isotope dilution mass spectrometry

C. Brauckmann<sup>1</sup>, C. Frank<sup>1</sup>, D. Schulze<sup>1</sup>, P. Kaiser<sup>2</sup>, R. Stosch<sup>1</sup> and C. Swart<sup>1</sup>

<sup>1</sup>Physikalisch-Technische Bundesanstalt, Bundesallee 100, 38116 Braunschweig, Germany.

<sup>2</sup>INSTAND e. V., Ueberstraße 20, 40223 Düsseldorf, Germany.

#### Stability of the HGB-spike

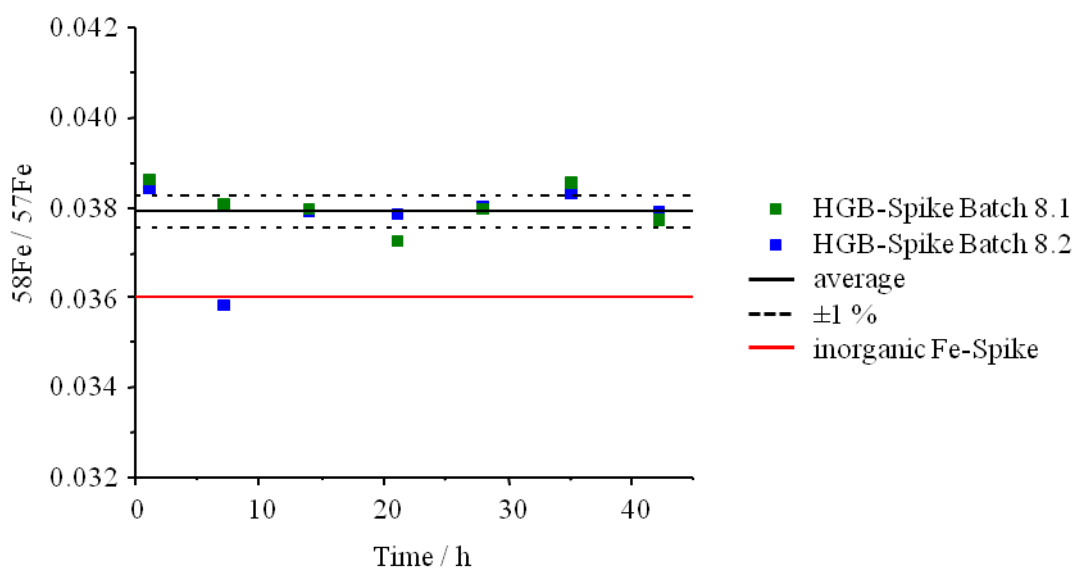

Figure ESI-1: Stability investigation of HGB spike of two different aliquots from the same batch (batch 8) using MonoQ®-ICP-MS. Batch 8.1 was dissolved in 12.5 mol Tris-buffer pH 7.8 and stored at  $-20\text{ }^{\circ}\text{C}$  for 5 months, batch 8.2 was dissolved prior to the measurement. Isotopic ratio of  $^{58}\text{Fe}/^{57}\text{Fe}$  the HGB-spike of batch 8.1 and batch 8.2 over a time period of 42 h is illustrated.

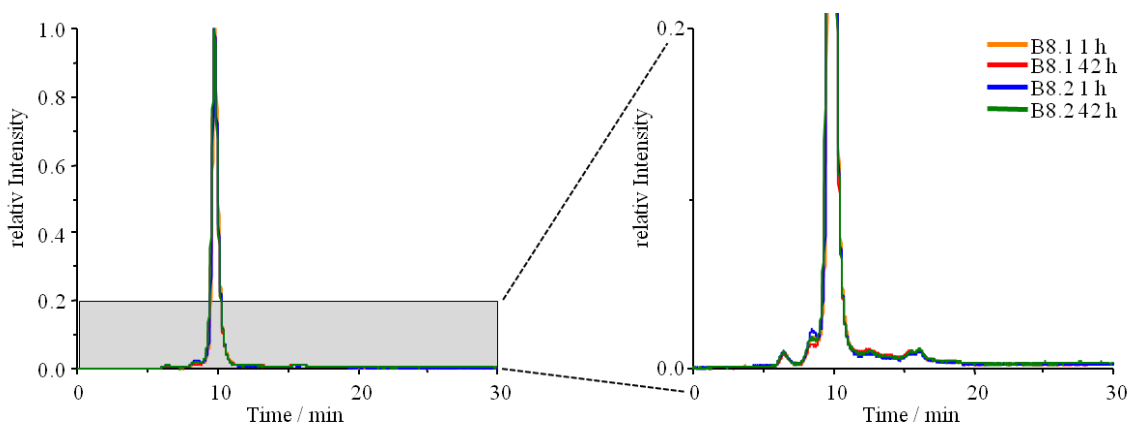

Figure ESI-2: MonoQ®-ICP-MS chromatograms of the HGB spike derivatised with KCN. In the close up the additional Fe peaks are shown which are stable during the analysis time and no further peaks appear.

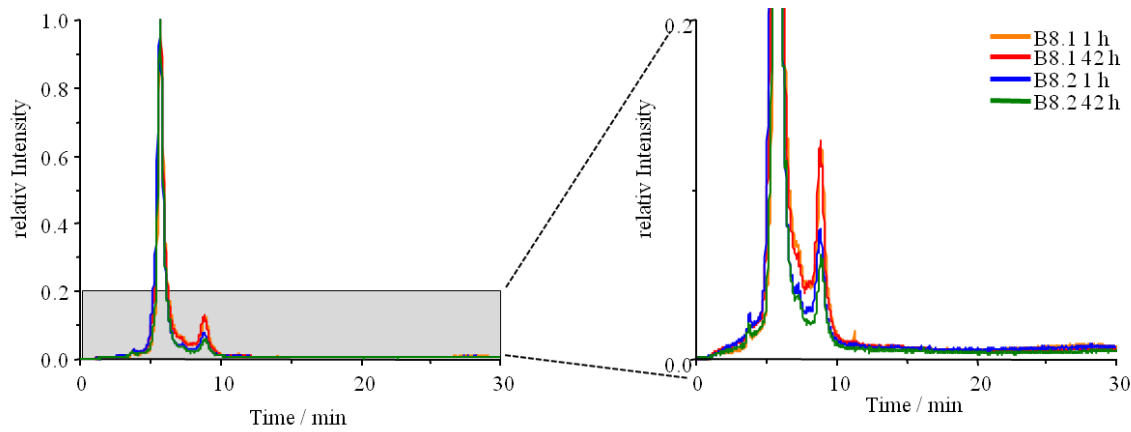

**Figure ESI-3: MonoQ<sup>®</sup>-ICP-MS chromatograms of the HGB spike. In the close up the additional Fe peaks are shown which are stable during the analysis time and no further peaks appear.**

## HGB-spike applied in species-specific IDMS

In the following the equations for the evaluation of the double <sup>1</sup> (equation 1) and triple <sup>2,3</sup> (equation 2) IDMS approaches are shown.

Equation 1: Double IDMS:

$$w_x = w_z \cdot \frac{m_{yx}}{m_x} \cdot \frac{m_z}{m_{yz}} \cdot \frac{R_y - R_{bx}}{R_{bx} - R_x} \cdot \frac{R_{bz} - R_z}{R_y - R_{bz}}$$

Equation 2: Triple IDMS:

$$w_x = w_z \cdot \frac{m_{yx}}{m_x} \cdot \frac{1}{R_x - R_{bx}} \left[ \frac{m_{z1}}{m_{yz1}} \cdot \frac{R_{bz2} - R_{bx}}{R_{bz2} - R_{bz1}} \cdot (R_x - R_{bz1}) + \frac{m_{z2}}{m_{yz2}} \cdot \frac{R_{bx} - R_{bz1}}{R_{bz2} - R_{bz1}} \cdot (R_x - R_{bz2}) \right]$$

Symbol explanation for equation 1 & 2:

| Symbol (Unit)                | Quantity                                                                                                                                    |
|------------------------------|---------------------------------------------------------------------------------------------------------------------------------------------|
| $w_x, w_z$ (g/kg)            | Mass fraction of Fe in sample x, spike y and the references z                                                                               |
| $m_x, m_z$ (g)               | Mass of the solutions of sample x and reference z in the blends                                                                             |
| $m_{yx}, m_{yz}$ (g)         | Mass of spike solution used to prepare the blends bx (sample x + spike y) and bz, bz1, bz2 (reference z + spike y)                          |
| $R_x, R_y, R_z$ (mol/mol)    | Isotope amount ratio of the analyte ( <sup>57</sup> Fe/ <sup>56</sup> Fe) in sample x, spike y and reference z                              |
| $R_{bx}$ (mol/mol)           | Isotope amount ratio of the analyte ( <sup>57</sup> Fe/ <sup>56</sup> Fe) in the blend bx (sample x + spike y)                              |
| $R_{bz1}, R_{bz2}$ (mol/mol) | Isotope amount ratio of the analyte ( <sup>57</sup> Fe/ <sup>56</sup> Fe) in the blends bz1 and bz2 (reference z + spike y) for triple IDMS |
| $R_{bz}$ (mol/mol)           | Isotope amount ratio of the analyte ( <sup>57</sup> Fe/ <sup>56</sup> Fe) in the blend bz (reference z + spike y) for double IDMS           |

**Uncertainty budget of double IDMS of IRMM/IFCC-467 by means of SEC-ICP-MS calculated with GUM workbench:**

**Result:  $w_x$ :** mass fraction of HGB in IFCC-467

| Quantity   | Value            | Standard Uncertainty         | Distribution | Sensitivity Coefficient | Uncertainty Contribution  | Index  |
|------------|------------------|------------------------------|--------------|-------------------------|---------------------------|--------|
| $m_{yx}$   | 0.02909 g        | $14.5 \cdot 10^{-6}$ g       | normal       | 4200                    | 0.061 mg/g                | 0.5 %  |
| $m_x$      | 0.02974 g        | $14.9 \cdot 10^{-6}$ g       | normal       | -4100                   | -0.061 mg/g               | 0.5 %  |
| $m_z$      | 0.02964 g        | $14.8 \cdot 10^{-6}$ g       | normal       | 4100                    | 0.061 mg/g                | 0.5 %  |
| $m_{yz}$   | 0.02819 g        | $14.1 \cdot 10^{-6}$ g       | normal       | -4300                   | -0.061 mg/g               | 0.5 %  |
| $R_y$      | 174.63 mol/mol   | 0.290 mol/mol                | normal       | $-380 \cdot 10^{-6}$    | $-110 \cdot 10^{-6}$ mg/g | 0.0 %  |
| $m_{IFCC}$ | 0.05054 g        | $25.3 \cdot 10^{-6}$ g       | normal       | -2400                   | -0.061 mg/g               | 0.5 %  |
| $m_{xv}$   | 1.49226 g        | $746 \cdot 10^{-6}$ g        | normal       | 81                      | 0.061 mg/g                | 0.5 %  |
| $x_{z57}$  | 0.021191 mol/mol | $32.5 \cdot 10^{-6}$ mol/mol | normal       | 11                      | $350 \cdot 10^{-6}$ mg/g  | 0.0 %  |
| $x_{z56}$  | 0.91754 mol/mol  | $180 \cdot 10^{-6}$ mol/mol  | normal       | -0.25                   | $-45 \cdot 10^{-6}$ mg/g  | 0.0 %  |
| $R_{bx}$   | 1.05559 mol/mol  | $5.76 \cdot 10^{-3}$ mol/mol | normal       | -120                    | -0.68 mg/g                | 59.8 % |
| $R_{bz}$   | 1.15079 mol/mol  | $2.96 \cdot 10^{-3}$ mol/mol | normal       | 110                     | 0.32 mg/g                 | 13.2 % |
| $k_{mg}$   | 1000.0 mg/g      |                              |              |                         |                           |        |
| $w_{pur}$  | 0.4794 kg/kg     | $1.68 \cdot 10^{-3}$ kg/kg   | normal       | 250                     | 0.43 mg/g                 | 23.2 % |
| $m_{HBA0}$ | 0.01134 g        | $5.67 \cdot 10^{-6}$ g       | normal       | 11000                   | 0.061 mg/g                | 0.5 %  |
| $m_{Lsg}$  | 1.48415 g        | $742 \cdot 10^{-6}$ g        | normal       | -82                     | -0.061 mg/g               | 0.5 %  |
| $w_x$      | 121.555 mg/g     | 0.883 mg/g                   |              |                         |                           |        |

## Uncertainty budget of triple IDMS of IRMM/IFCC-467 by means of SEC-ICP-MS calculated with GUM workbench:

Result:  $w_x$ : mass fraction of HGB in IRMM/IFCC-467

| Quantity          | Value           | Standard Uncertainty         | Distribution | Sensitivity Coefficient | Uncertainty Contribution | Index  |
|-------------------|-----------------|------------------------------|--------------|-------------------------|--------------------------|--------|
| $m_{yx}$          | 0.02909 g       | $14.5 \cdot 10^{-6}$ g       | normal       | 4200                    | 0.061 mg/g               | 0.4 %  |
| $m_x$             | 0.02974 g       | $14.9 \cdot 10^{-6}$ g       | normal       | -4100                   | -0.061 mg/g              | 0.4 %  |
| $m_{z1}$          | 0.02964 g       | $14.8 \cdot 10^{-6}$ g       | normal       | 890                     | 0.013 mg/g               | 0.0 %  |
| $m_{yz1}$         | 0.02819 g       | $14.1 \cdot 10^{-6}$ g       | normal       | -940                    | -0.013 mg/g              | 0.0 %  |
| $m_{z2}$          | 0.03237 g       | $16.2 \cdot 10^{-6}$ g       | normal       | 2900                    | 0.048 mg/g               | 0.2 %  |
| $m_{yz2}$         | 0.02744 g       | $13.7 \cdot 10^{-6}$ g       | normal       | -3500                   | -0.048 mg/g              | 0.2 %  |
| $x_{57}$          | 0.02119 mol/mol | $50.0 \cdot 10^{-6}$ mol/mol | normal       | -0.27                   | $-13 \cdot 10^{-6}$ mg/g | 0.0 %  |
| $x_{56}$          | 0.91754 mol/mol | $180 \cdot 10^{-6}$ mol/mol  | normal       | $6.1 \cdot 10^{-3}$     | $1.1 \cdot 10^{-6}$ mg/g | 0.0 %  |
| $k_{\text{conv}}$ | 1000.0 mg/g     |                              |              |                         |                          |        |
| $w_{\text{pur}}$  | 0.47940 g/g     | $1.68 \cdot 10^{-3}$ g/g     | normal       | 250                     | 0.43 mg/g                | 19.2 % |
| $m_{\text{HBA0}}$ | 0.01134 g       | $5.67 \cdot 10^{-6}$ g       | normal       | 11000                   | 0.061 mg/g               | 0.4 %  |
| $m_{\text{Lsg}}$  | 1.48415 g       | $742 \cdot 10^{-6}$ g        | normal       | -82                     | -0.061 mg/g              | 0.4 %  |
| $m_{\text{IFCC}}$ | 0.05054 g       | $25.3 \cdot 10^{-6}$ g       | normal       | -2400                   | -0.061 mg/g              | 0.4 %  |
| $m_{\text{xv}}$   | 1.49226 g       | $746 \cdot 10^{-6}$ g        | normal       | 81                      | 0.061 mg/g               | 0.4 %  |
| $R_{\text{bx}}$   | 1.13914 mol/mol | $6.22 \cdot 10^{-3}$ mol/mol | normal       | -110                    | -0.68 mg/g               | 49.6 % |
| $R_{\text{bz2}}$  | 1.11060 mol/mol | $5.78 \cdot 10^{-3}$ mol/mol | normal       | 88                      | 0.51 mg/g                | 27.8 % |
| $R_{\text{bz1}}$  | 1.24188 mol/mol | $3.19 \cdot 10^{-3}$ mol/mol | normal       | 22                      | 0.070 mg/g               | 0.5 %  |
| $w_x$             | 121.576 mg/g    | 0.971 mg/g                   |              |                         |                          |        |

Symbol explanation for both uncertainty budgets:

| Symbol (Unit)                              | Quantity                                                                                                                                  |
|--------------------------------------------|-------------------------------------------------------------------------------------------------------------------------------------------|
| $w_x, w_z$ (g/kg)                          | Mass fraction of Fe in sample x, spike y and the references z                                                                             |
| $m_x, m_z$ (g)                             | Mass of the solutions of sample x and reference z in the blends                                                                           |
| $m_{yx}, m_{yz}$ (g)                       | Mass of spike solution used to prepare the blends bx (sample x + spike y) and bz, bz1, bz2 (reference z + spike y)                        |
| $R_x, R_y, R_z$ (mol/mol)                  | Isotope amount ratio of the analyte ( $^{57}\text{Fe}/^{56}\text{Fe}$ ) in sample x, spike y and reference z                              |
| $R_{\text{bx}}$ (mol/mol)                  | Isotope amount ratio of the analyte ( $^{57}\text{Fe}/^{56}\text{Fe}$ ) in the blend bx (sample x + spike y)                              |
| $R_{\text{bz1}}, R_{\text{bz2}}$ (mol/mol) | Isotope amount ratio of the analyte ( $^{57}\text{Fe}/^{56}\text{Fe}$ ) in the blends bz1 and bz2 (reference z + spike y) for triple IDMS |
| $R_{\text{bz}}$ (mol/mol)                  | Isotope amount ratio of the analyte ( $^{57}\text{Fe}/^{56}\text{Fe}$ ) in the blend bz (reference z + spike y) for double IDMS           |
| $x_{z57}, x_{z56}$ (mol/mol)               | Amount-of substance fraction of the isotopes 56 and 57, resp., in natural Fe                                                              |
| $w_{\text{pur}}$ (kg/kg)                   | Purity of the HGB reference material                                                                                                      |
| $m_{\text{HBA0}}, m_{\text{Lsg}}$          | Mass of the solution steps of the reference                                                                                               |

## References:

1. M. Sargent, C. Harrington and R. Harte, *Guidelines for achieving high accuracy in isotope dilution mass spectrometry (IDMS)*, Royal Society of Chemistry, Cambridge, 2002.
2. C. Frank, O. Rienitz, C. Swart and D. Schiel, *Anal Bioanal Chem*, 2013, **405**, 1913-1919.
3. J. Vogl, *J Anal Atom Spectrom*, 2007, **22**, 475-492.
